# Supplementary material for: Photoluminescence properties of a novel cyclometalated iridium(iii) complex with coumarin-boronate and its recognition of hydrogen peroxide
Source: Royal Society of Chemistry journal article supplement (doi:10.1039/c3dt53498g), 2014-01-01

## Electronic Supplementary Information

### Photoluminescence properties of a novel cyclometalated iridium(III) complex with coumarin-boronate and its recognition to hydrogen peroxide

Chunxiang Li,<sup>\*a</sup> Shuqin Wang,<sup>a</sup> Yangmei Huang,<sup>a</sup> Qin Wen,<sup>a</sup> and Yuhe Kan<sup>b</sup>

<sup>a</sup> *Key Laboratory of Sensor Analysis of Tumor Marker, Ministry of Education, College of Chemistry and Molecular Engineering, Qingdao University of Science and Technology, Qingdao 266042, P. R. China;*

<sup>b</sup> *Jiangsu Province Key Laboratory for Chemistry of Low-Dimensional Materials, School of Chemistry and Chemical Engineering, Huaiyin Normal University, Huai'an, Jiangsu, 223300, P. R. China.*

#### Contents

|                                                                         |    |
|-------------------------------------------------------------------------|----|
| Contour plots of TD-DFT calculations                                    | S2 |
| Optimum condition                                                       | S3 |
| <sup>1</sup> H and <sup>13</sup> C NMR Spectra of synthesized Complexes | S4 |

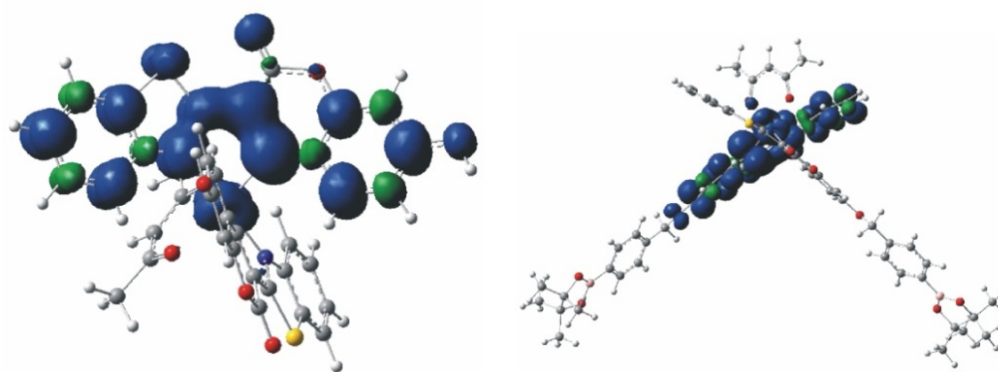

Figure S1 Countour plots of the spin density of the lowest-lying triplet state geometry of complex **Ir-2** (isovalue 0.002).

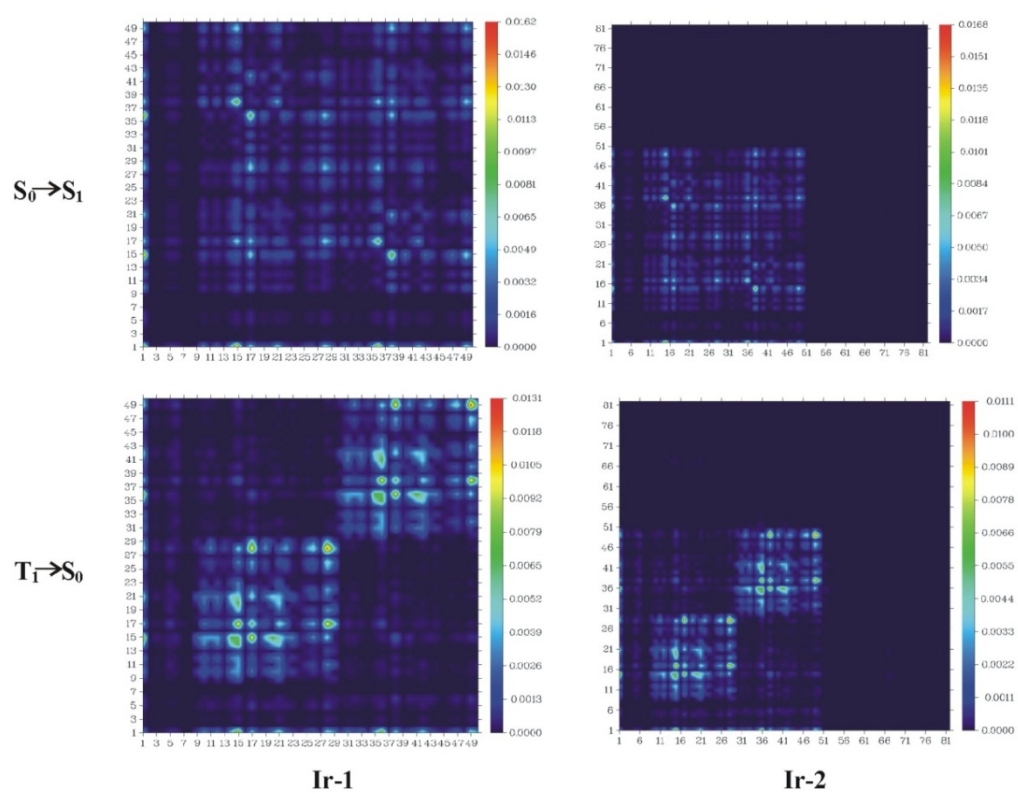

Figure S2. Contour plots of transition density matrices upon the  $S_0 \rightarrow S_1$  and  $T_1 \rightarrow S_0$  transition for **Ir-1** and **Ir-2**.

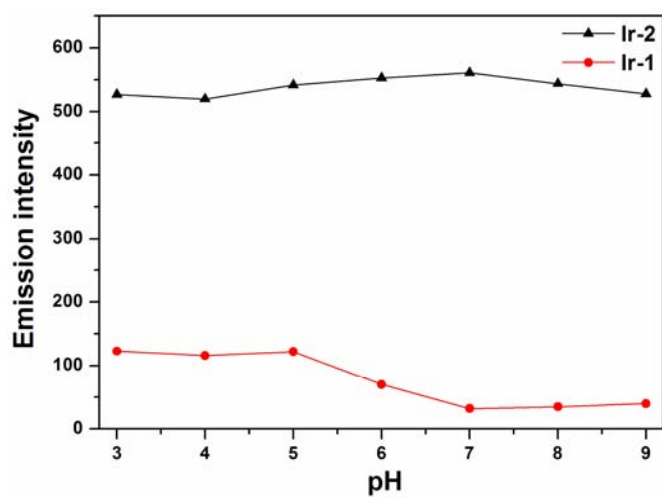

Figure S3. Effect of pH on emission spectra of **Ir-1** and **Ir-2** in CH<sub>3</sub>CN-PBS (20 mM, v/v = 1:4)

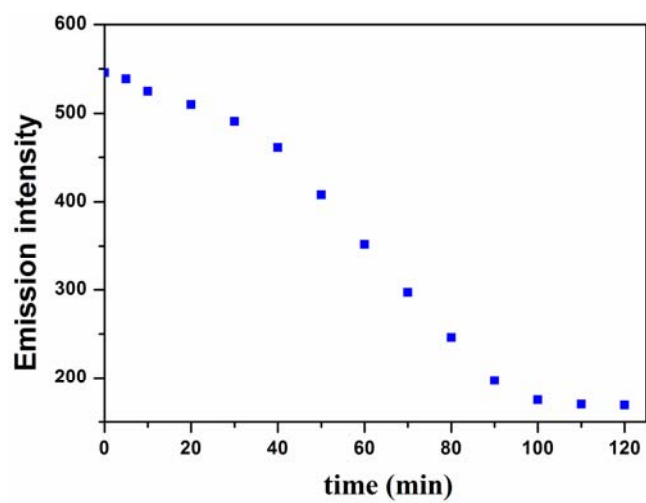

Figure S4. Time course of the reaction between the probe and H<sub>2</sub>O<sub>2</sub>

### $^1\text{H}$ NMR of Bthc

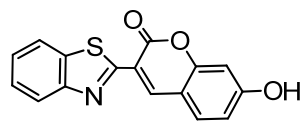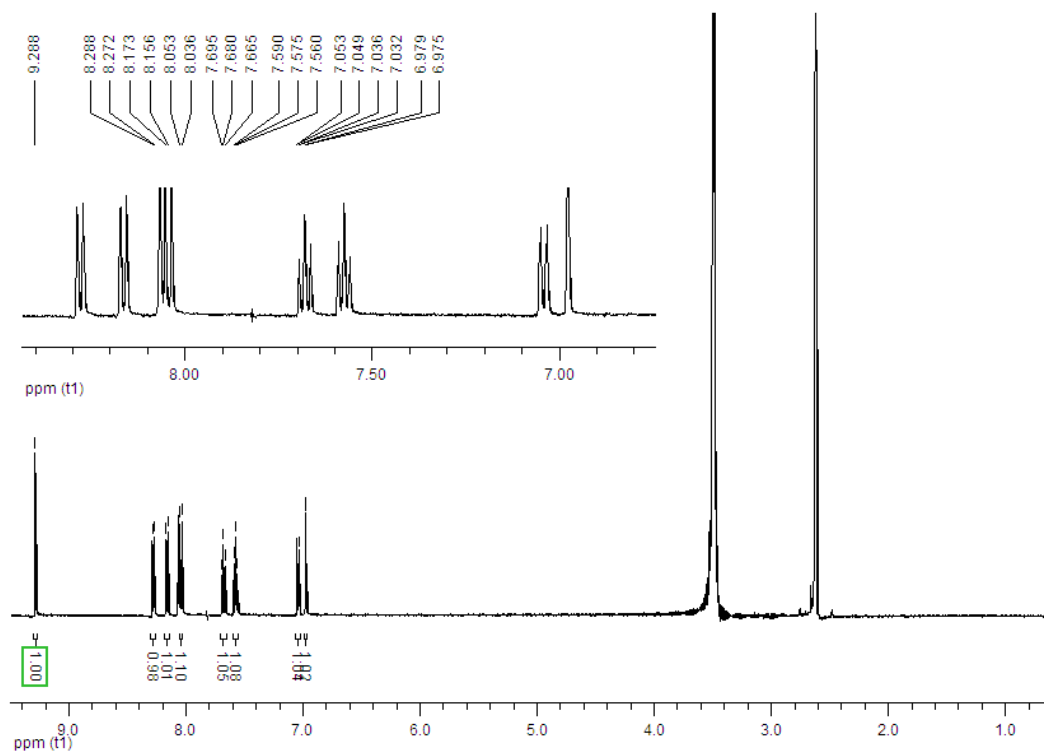

### $^1\text{H}$ NMR of Ir-1

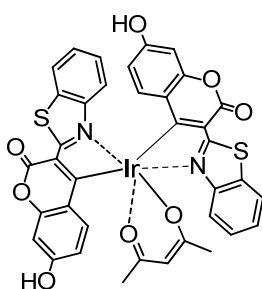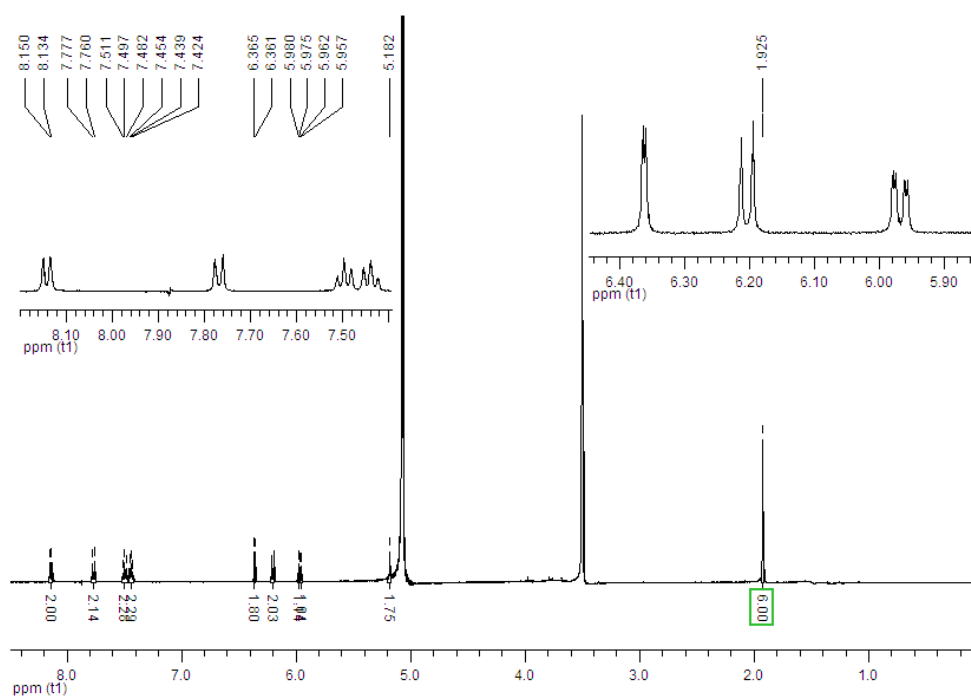

### <sup>1</sup>H NMR of Bthc-bpe

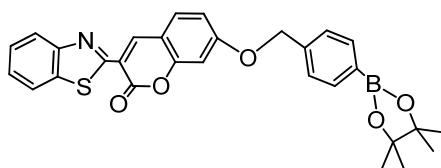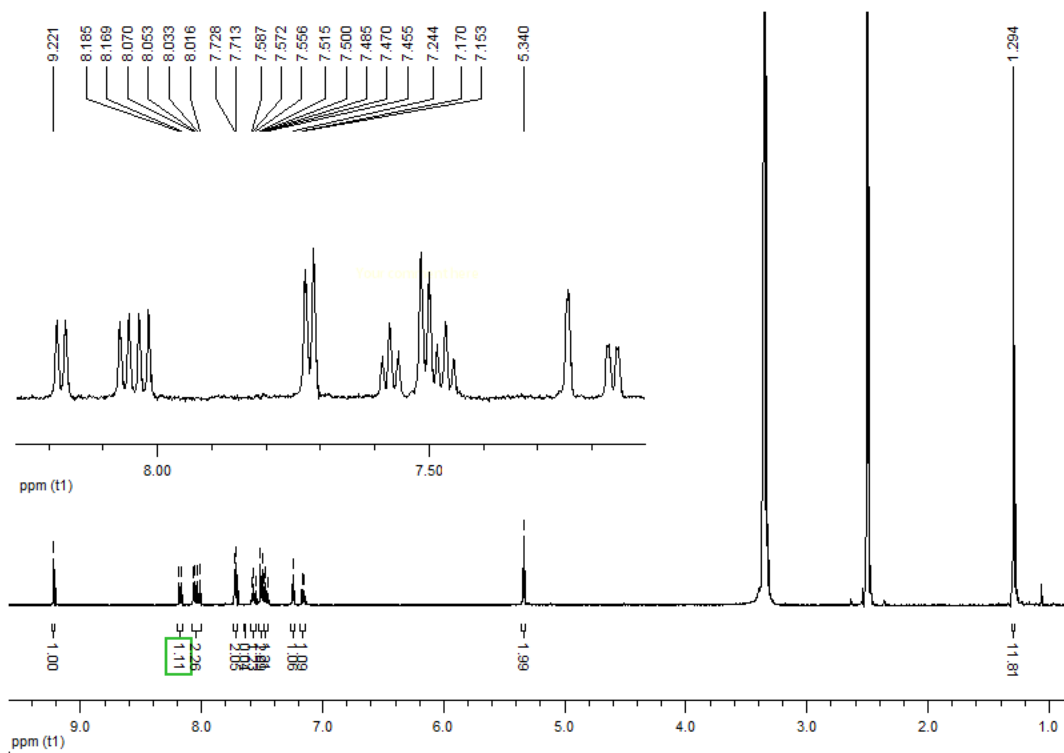

### $^1\text{H}$ NMR of Ir-2

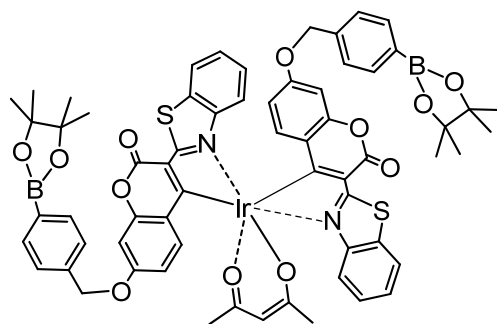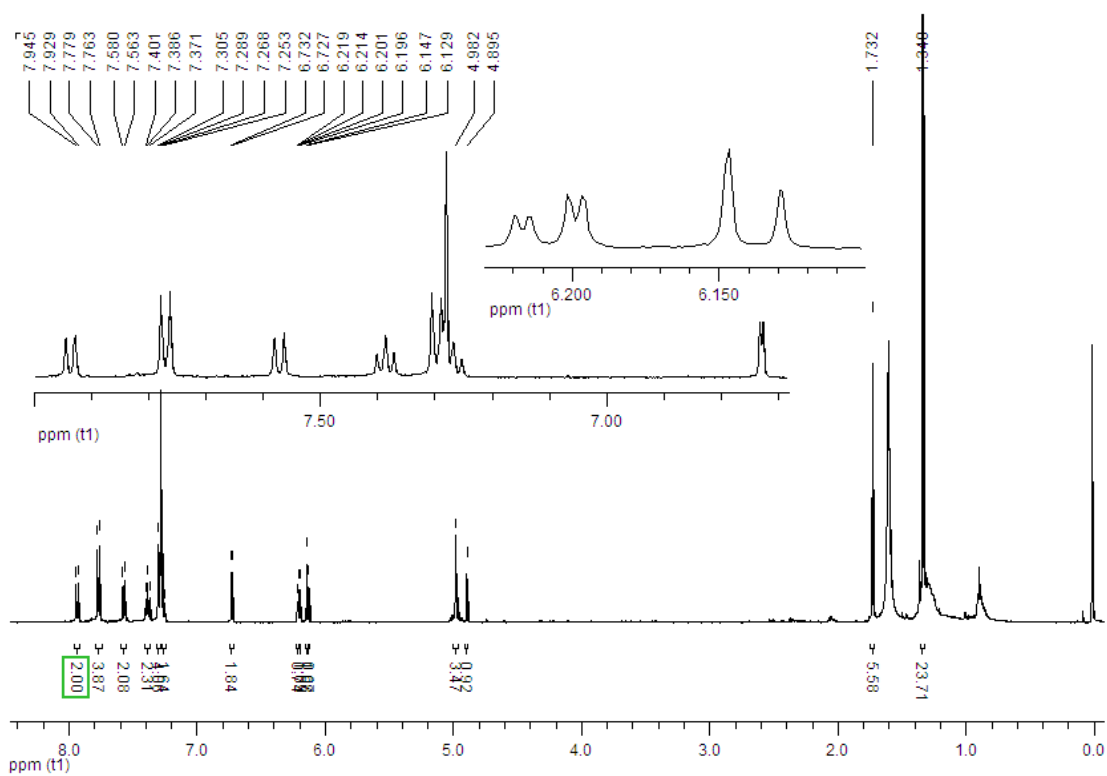

### $^{13}\text{C}$ NMR of Ir-2

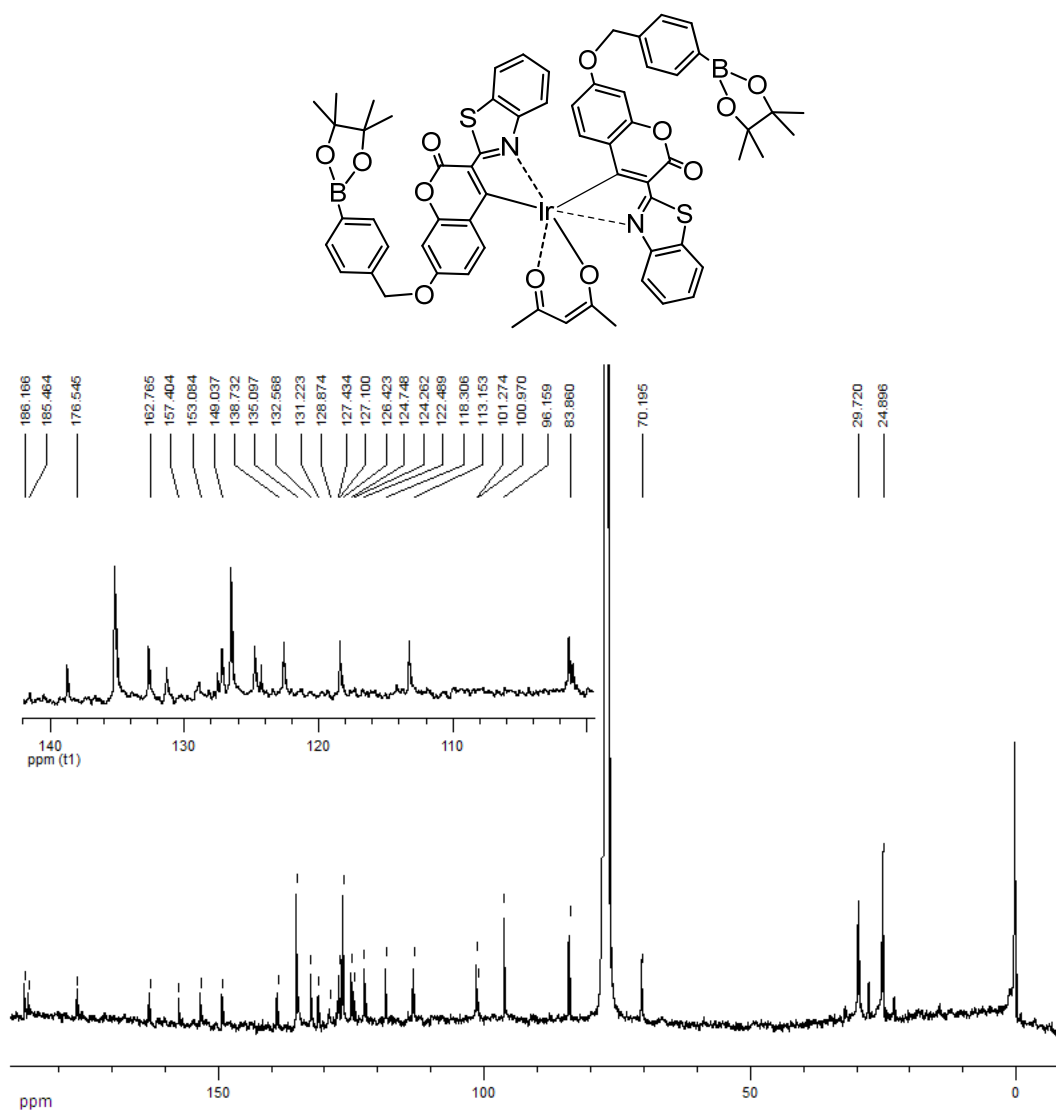

Supplement: c3dt53498g.pdf [file c3dt53498g.pdf]
